# Supplementary material for: Comparative paraCEST effect of amide and hydroxy groups in divalent cobalt and nickel complexes of tripyridine-based ligands
Source: Royal Society of Chemistry journal article supplement (doi:10.1039/d3dt01422c), 2023-01-01
Supplement: d3dt01422c1.pdf [file d3dt01422c1.pdf]

## Supporting Information

### **Comparative ParaCEST effect of amide and hydroxy group in divalent Cobalt and Nickel complexes of tripyridine-based ligands**

Suvam Kumar Panda,<sup>a</sup> Julia Torres,<sup>b</sup> Carlos Kremer,<sup>b</sup> and Akhilesh Kumar Singh<sup>\*a</sup>

<sup>a</sup>Indian Institute of Technology Bhubaneswar, Khordha, Odisha, India, Pin-752050.

<sup>b</sup>Área de Química Inorgánica – DEC, Facultad de Química, Universidad de la República, Montevideo, 11800, Uruguay.

### Contents

- 1. Figure S1.** <sup>1</sup>H NMR (400 MHz) of compound 3 recorded in CDCl<sub>3</sub> (\* mark indicates the residual peak of solvent).
- 2. Figure S2.** <sup>13</sup>C NMR (100 MHz) of compound 3 recorded in CDCl<sub>3</sub> (\* mark indicates the residual peak of solvent).
- 3. Figure S3.** <sup>1</sup>H NMR (400 MHz) of TDTA recorded in DMSO-*d*<sub>6</sub> (\* mark indicates the residual peak of solvent).
- 4. Figure S4.** <sup>13</sup>C NMR (100 MHz) of TDTA recorded in DMSO-*d*<sub>6</sub> (\* mark indicates the residual peak of solvent).
- 5. Figure S5.** <sup>1</sup>H NMR (400 MHz) of compound 4 recorded in CDCl<sub>3</sub>.
- 6. Figure S6.** <sup>13</sup>C NMR (100 MHz) of compound 4 recorded in CDCl<sub>3</sub> (\* mark indicates the residual peak of solvent).
- 7. Figure S7.** <sup>1</sup>H NMR (400 MHz) of TMTP recorded in DMSO-*d*<sub>6</sub> (\* mark indicates the residual peak of solvent).
- 8. Figure S8.** <sup>13</sup>C NMR (100 MHz) of TMTP recorded in DMSO-*d*<sub>6</sub> (\* mark indicates the residual peak of solvent).
- 9. Figure S9.** HRMS spectrum of compound 3.
- 10. Figure S10.** HRMS spectrum of ligand TDTA.
- 11. Figure S11.** HRMS spectrum of [Co(TDTA)]<sup>2+</sup>.
- 12. Figure S12.** HRMS spectrum of [Ni(TDTA)]<sup>2+</sup>.
- 13. Figure S13.** HRMS spectrum of compound 4.
- 14. Figure S14.** HRMS spectrum of ligand TMTP.
- 15. Figure S15.** HRMS spectrum of [Co(TDTA)]<sup>2+</sup>.
- 16. Figure S16.** HRMS spectrum of [Ni(TDTA)]<sup>2+</sup>.

- 17. Figure S17.** Species distribution diagram for TMTP and TDTA at 25.0 °C and  $I = 0.15 \text{ mol}\cdot\text{L}^{-1} \text{ NaClO}_4$ .
- 18. Figure S18.** Fit goodness for the protonation of TMTP (a) and TDTA (b), ( $0.15 \text{ M NaClO}_4$  at 25.0 °C).
- 19. Figure S19.** Species distribution diagram for Co-TMTP system at 25.0 °C and  $I = 0.15 \text{ mol}\cdot\text{L}^{-1} \text{ NaClO}_4$ .  $[\text{Co}^{2+}]_{\text{total}} = 0.002 \text{ mol}\cdot\text{L}^{-1}$ ,  $[\text{TMTP}]_{\text{total}} = 0.004 \text{ mol}\cdot\text{L}^{-1}$ .
- 20. Figure S20.** Fit goodness for the systems Co(II)-TDTA and Co(II)-TMTP (a) Ni(II)-TMTP (b), and Cu(II)-TMTP ( $0.15 \text{ M NaClO}_4$  at 25.0 °C).
- 21. Figure S21.**  $^1\text{H}$  NMR spectra of the four complexes recorded in  $\text{DMSO-}d_6$  and upon addition of 30  $\mu\text{L}$   $\text{D}_2\text{O}$  to the same NMR tube. The exchangeable (NH) protons are represented by an \* mark.
- 22. Figure S22.**  $^1\text{H}$  NMR spectra of the  $[\text{Co}(\text{TDTA})]^{2+}$  and  $[\text{Ni}(\text{TDTA})]^{2+}$  by varying temperature (top) and pH (bottom). Temperature variation experiments were recorded in  $\text{D}_2\text{O}$ . pH variation experiments were performed by taking 10 mM complex, 20 mM HEPES, and 100 mM NaCl at 37 °C in distilled water, a  $\text{D}_2\text{O}$  sealed capillary tube was used inside the NMR tube for locking purposes.
- 23. Figure S23.**  $^1\text{H}$  NMR spectra of the  $[\text{Co}(\text{TMTP})]^{2+}$  and  $[\text{Ni}(\text{TMTP})]^{2+}$  by varying temperature (top) and pH (bottom). Temperature variation experiments were recorded in  $\text{D}_2\text{O}$ . pH variation experiments were performed by taking 10 mM complex, 20 mM HEPES, and 100 mM NaCl at 37 °C in distilled water, a  $\text{D}_2\text{O}$  sealed capillary tube was used inside the NMR tube for locking purposes.
- 24. Figure S24.**  $^1\text{H}$  NMR spectra (400 MHz) of 10 mM of  $[\text{Co}(\text{TMTP})]^{2+}$  in aqueous solutions containing 20 mM HEPES and 100 mM NaCl, buffered at various pH values from 2 – 5. The highlighted dotted region depicts the complex dissociation at lower pH values.
- 25. Figure S25.**  $^1\text{H}$  NMR spectra (400 MHz) of 10 mM of  $[\text{Ni}(\text{TMTP})]^{2+}$  in aqueous solutions containing 20 mM HEPES and 100 mM NaCl, buffered at various pH values from 2 – 5. The highlighted dotted region depicts the complex dissociation at lower pH values.
- 26. Figure S26.** 400 MHz NMR spectrum of the TMTP-Co complex in  $\text{DMSO-}d_6$  with the integration of all individual peaks (\* mark indicates the presence of exchangeable protons).
- 27. Figure S27.** 400 MHz NMR spectrum of the TMTP-Co complex in  $\text{D}_2\text{O}$  with the identification of all paramagnetic protons and their corresponding isomers.
- 28. Figure S28.** Possible isomers of the TMTP-Co complex in its solution state.

- 29. Figure S29.** CEST peak positions of the amide protons in TMTP-Co and TMTP-Ni complexes.
- 30. Figure S30.** CEST spectra of 10 mM  $[\text{Co}(\text{TDTA})]^{2+}$  and  $[\text{Ni}(\text{TDTA})]^{2+}$  (20 mM HEPES, pH 7.4, 400 MHz) at 37 °C with a saturation time of 4 s and saturation power of  $B_1 = 25 \mu\text{T}$
- 31. Figure S31.** CEST spectra of the exchangeable proton region of 10 mM  $[\text{Co}(\text{TMTP})]^{2+}$  (left) and  $[\text{Ni}(\text{TMTP})]^{2+}$  (right) in 20 mM HEPES and 100 mM NaCl at pH 7.4 with varied pre-saturation power levels. RF pre-saturation pulse was applied for 4 s with varying saturation power of 5  $\mu\text{T}$  to 25  $\mu\text{T}$  for  $[\text{Co}(\text{TMTP})]^{2+}$  and 15 to 25  $\mu\text{T}$  for  $[\text{Ni}(\text{TMTP})]^{2+}$ .
- 32. Figure S32.** Solution magnetic susceptibility data for  $[\text{Co}(\text{TDTA})]^{2+}$  (left) and  $[\text{Ni}(\text{TDTA})]^{2+}$  (right) were recorded at different pH by using 3 – 5 mM complex, 20 mM HEPES, and 100 mM NaCl at 37 °C.
- 33. Figure S33.** Solution magnetic susceptibility data for  $[\text{Co}(\text{TMTP})]^{2+}$  (left) and  $[\text{Ni}(\text{TMTP})]^{2+}$  (right) were recorded at different pH by using 3 – 5 mM complex, 20 mM HEPES, and 100 mM NaCl at 37 °C.
- 34. Figure S34.** UV spectrum (50  $\mu\text{M}$ ) of the ligand TMTP (left) and its Co(II), Ni(II), and Cu(II) complexes (right), recorded in 20 mM HEPES, and 100 mM NaCl at pH 7.4.
- 35. Figure S35.** UV-Vis spectra of  $[\text{Co}(\text{TMTP})]^{2+}$  (left) and  $[\text{Ni}(\text{TMTP})]^{2+}$  (right) (5 mM) in 20 mM HEPES, and 100 mM NaCl at pH 7.4.
- 36. Figure S36.** Metal displacement reaction of the  $[\text{Co}(\text{TMTP})]^{2+}$  and  $[\text{Ni}(\text{TMTP})]^{2+}$  complexes with competing Cu(II) ion, monitored for 8 hours at 264 nm. Samples containing 50  $\mu\text{M}$   $[\text{Co}(\text{TMTP})]^{2+}$  or  $[\text{Ni}(\text{TMTP})]^{2+}$  with 1, 2, and 5 equivalent ratios of  $\text{CuCl}_2$  ions in aqueous solutions containing 20 mM HEPES and 100 mM NaCl buffered at pH 7.4. A 50  $\mu\text{M}$   $[\text{Co}(\text{TMTP})]^{2+}$  sample is present to determine the absorbance of a 100% dissociation.
- 37. Figure S37.** UV-Vis kinetic study of the complexes  $[\text{Co}(\text{TMTP})]^{2+}$  and  $[\text{Ni}(\text{TMTP})]^{2+}$  at 264 nm in acidic conditions, pH 4, (left) and in the presence of competing anions like 25 mM  $\text{K}_2\text{CO}_3$  and 0.4 mM  $\text{K}_2\text{HPO}_4$  (right).
- 38. Figure S38.** Cyclic voltammogram of  $[\text{Co}(\text{TMTP})]^{2+}$  (left) and  $[\text{Ni}(\text{TMTP})]^{2+}$  (right) recorded in an aqueous phase contained 1 mM complex, 20 mM HEPES, and 100 mM NaCl (pH = 7.4).
- 39. Table S1.** Selected bond angles of the four complexes.

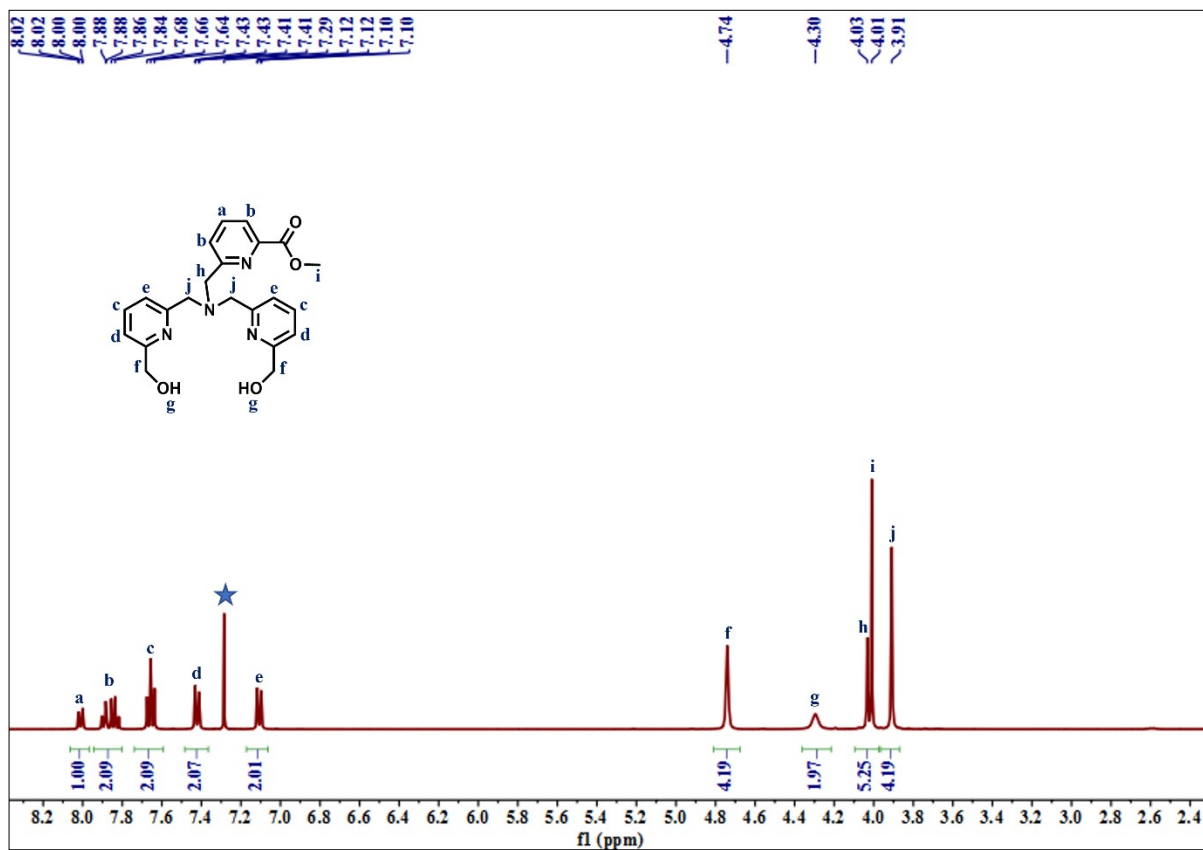

**Figure S1.** <sup>1</sup>H NMR (400 MHz) of compound 3 recorded in CDCl<sub>3</sub> (\* mark indicates the residual peak of solvent).

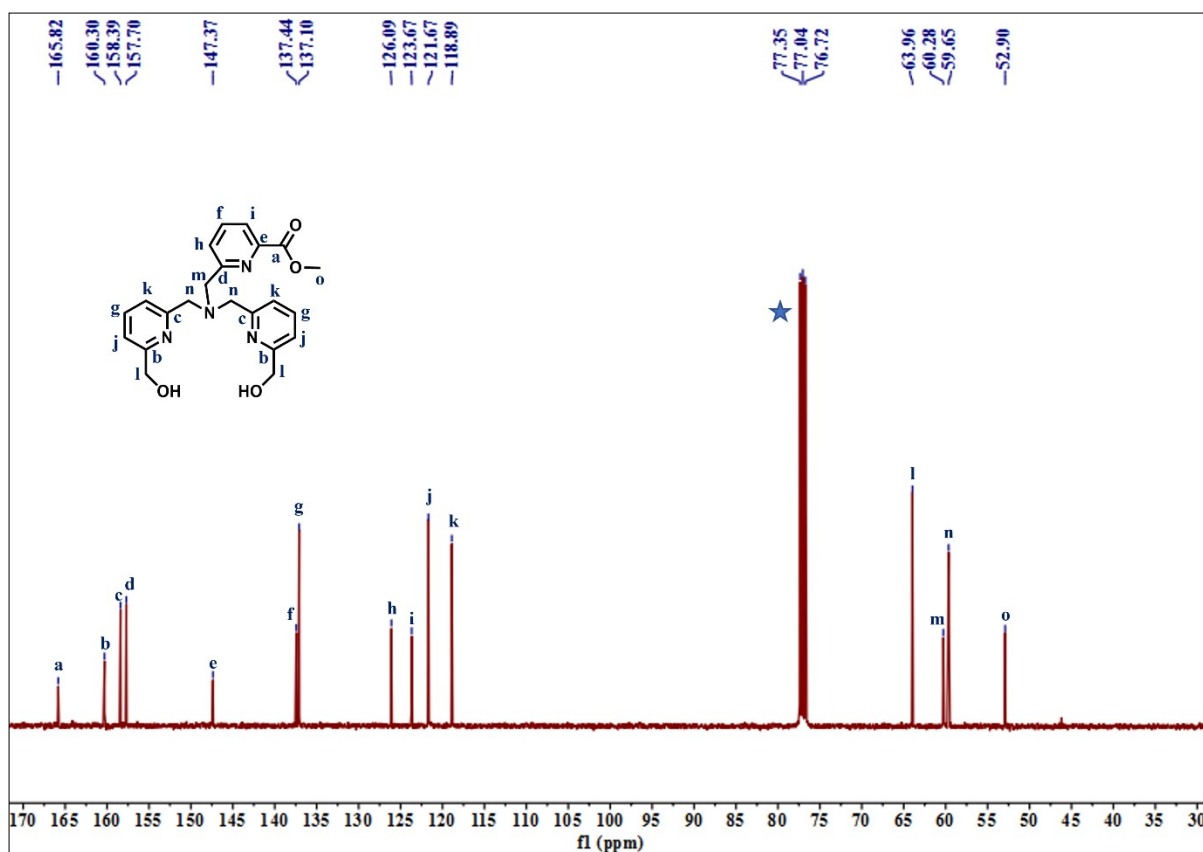

**Figure S2.** <sup>13</sup>C NMR (100 MHz) of compound 3 recorded in CDCl<sub>3</sub> (\* mark indicates the residual peak of solvent).

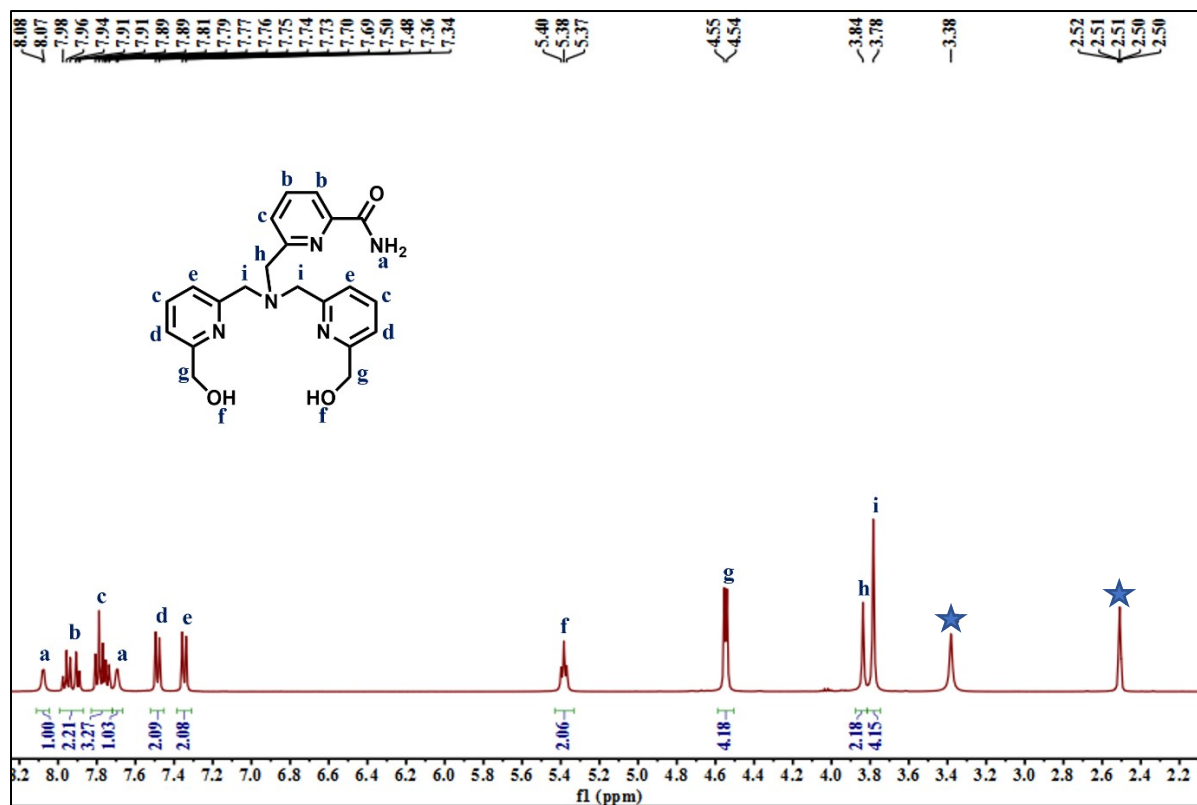

**Figure S3.** <sup>1</sup>H NMR (400 MHz) of TDTA recorded in DMSO-*d*<sub>6</sub> (\* mark indicates the residual peak of solvent).

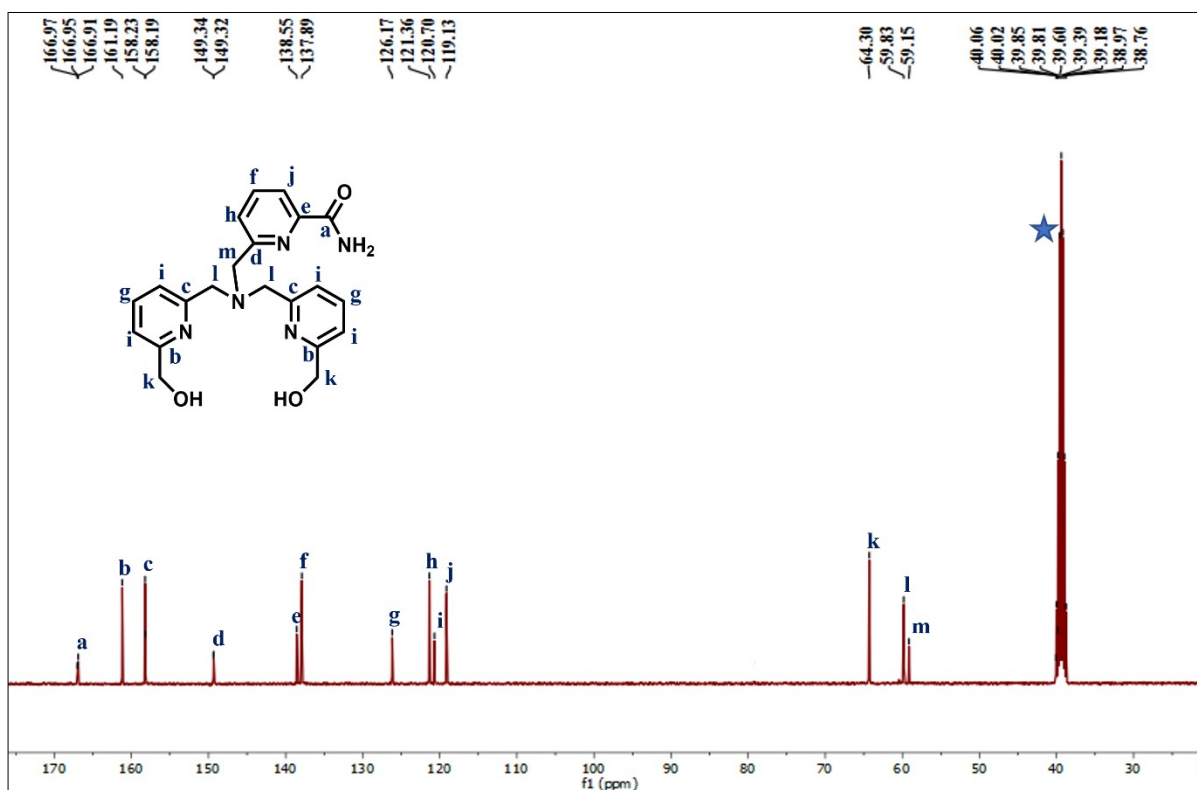

**Figure S4.** <sup>13</sup>C NMR (100 MHz) of TDTA recorded in DMSO-*d*<sub>6</sub> (\* mark indicates the residual peak of solvent).

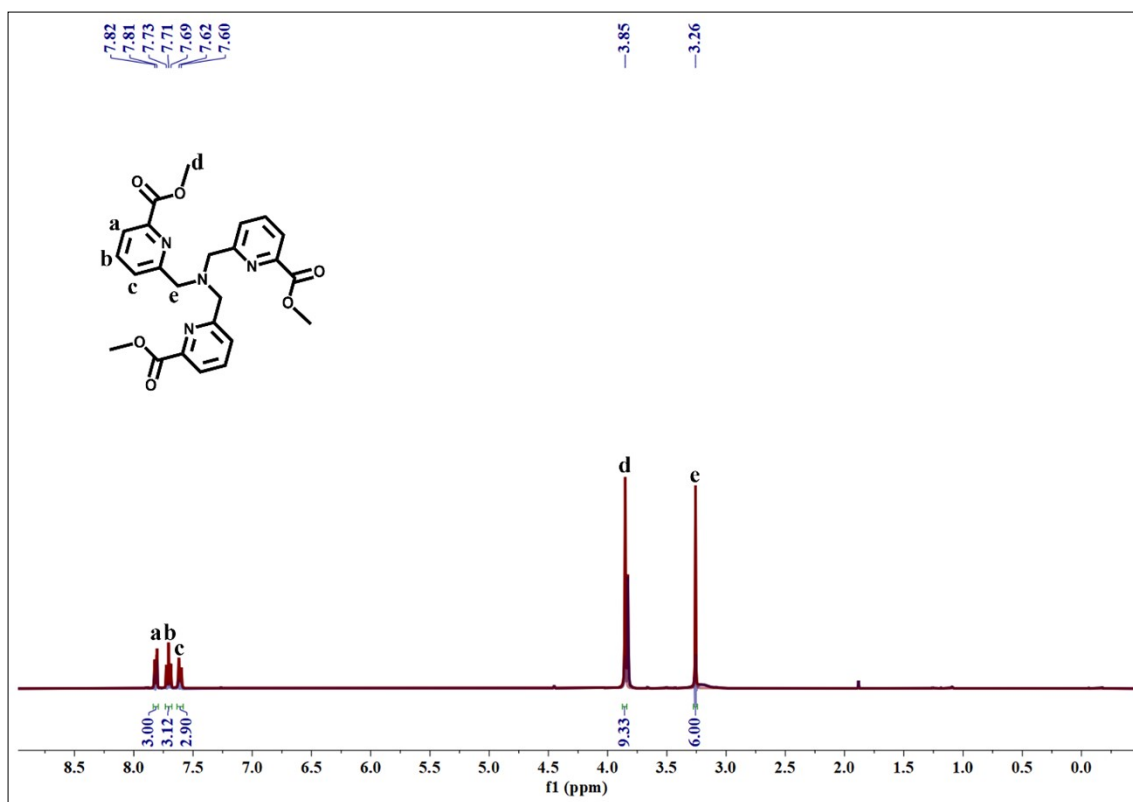

Figure S5.  $^1\text{H}$  NMR (400 MHz) of compound 4 recorded in  $\text{CDCl}_3$ .

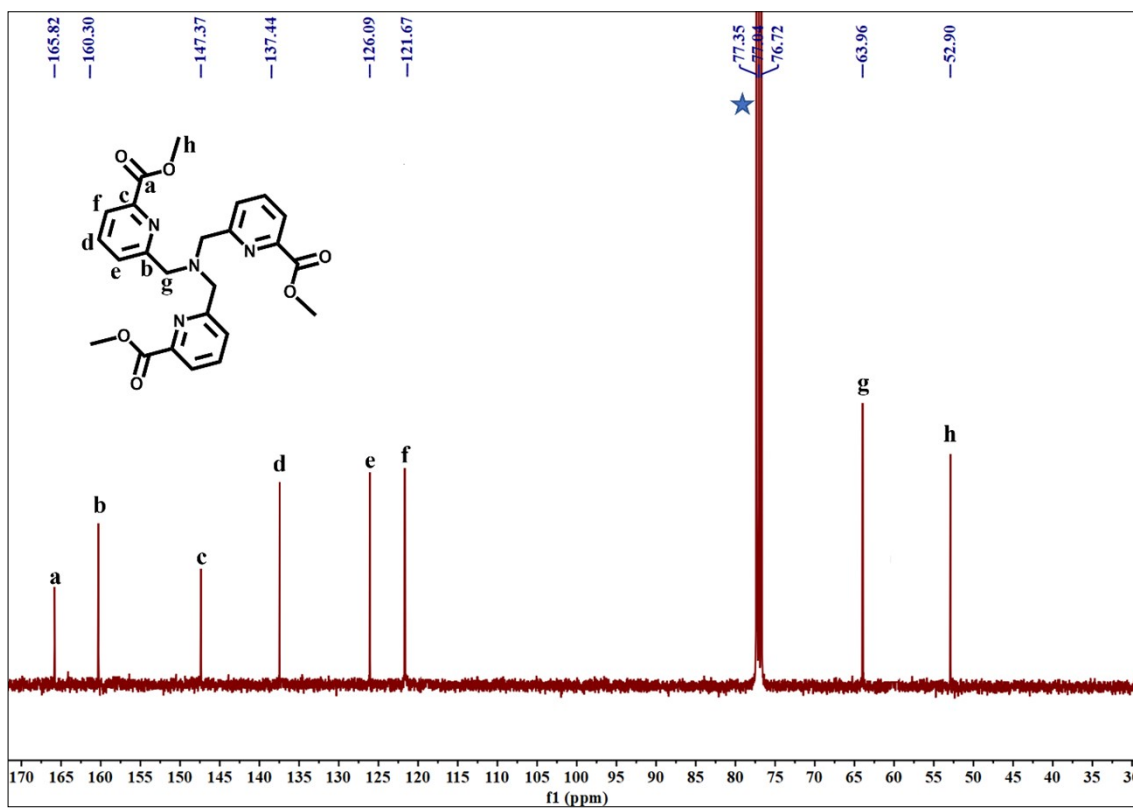

**Figure S6.**  $^{13}\text{C}$  NMR (100 MHz) of compound 4 recorded in  $\text{CDCl}_3$  (\* mark indicates the residual peak of solvent).

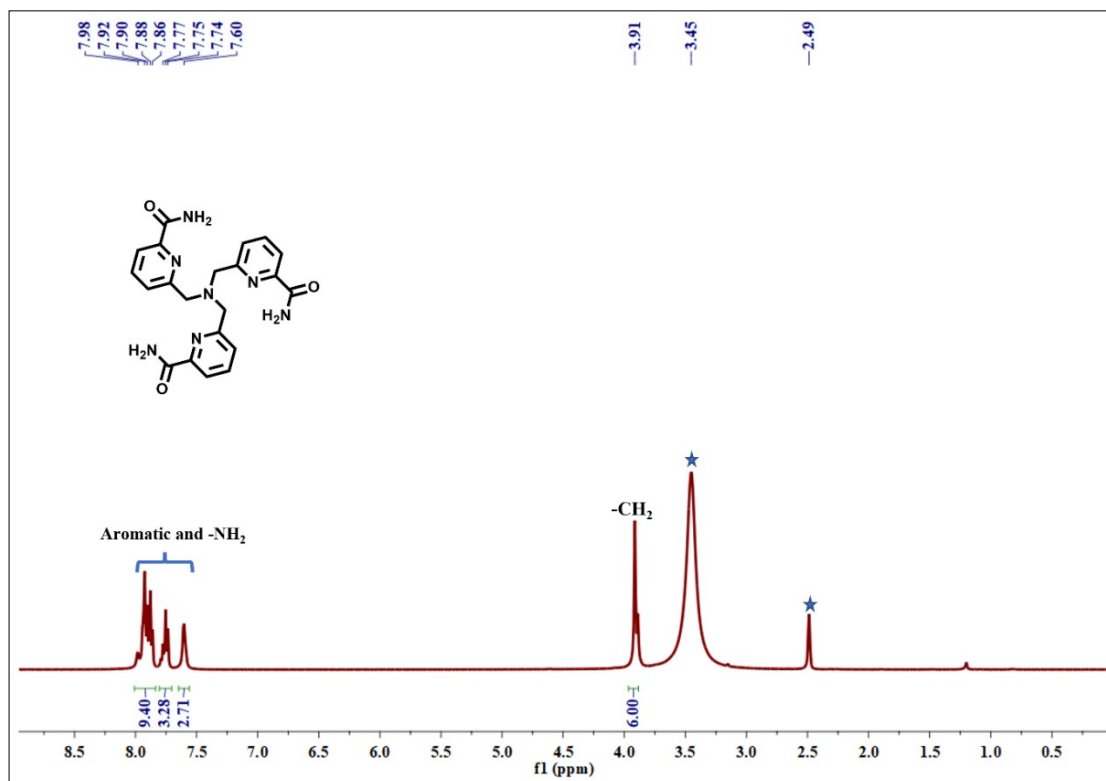

**Figure S7.**  $^1\text{H}$  NMR (400 MHz) of TMTP recorded in  $\text{DMSO-}d_6$  (\* mark indicates the residual peak of solvent).

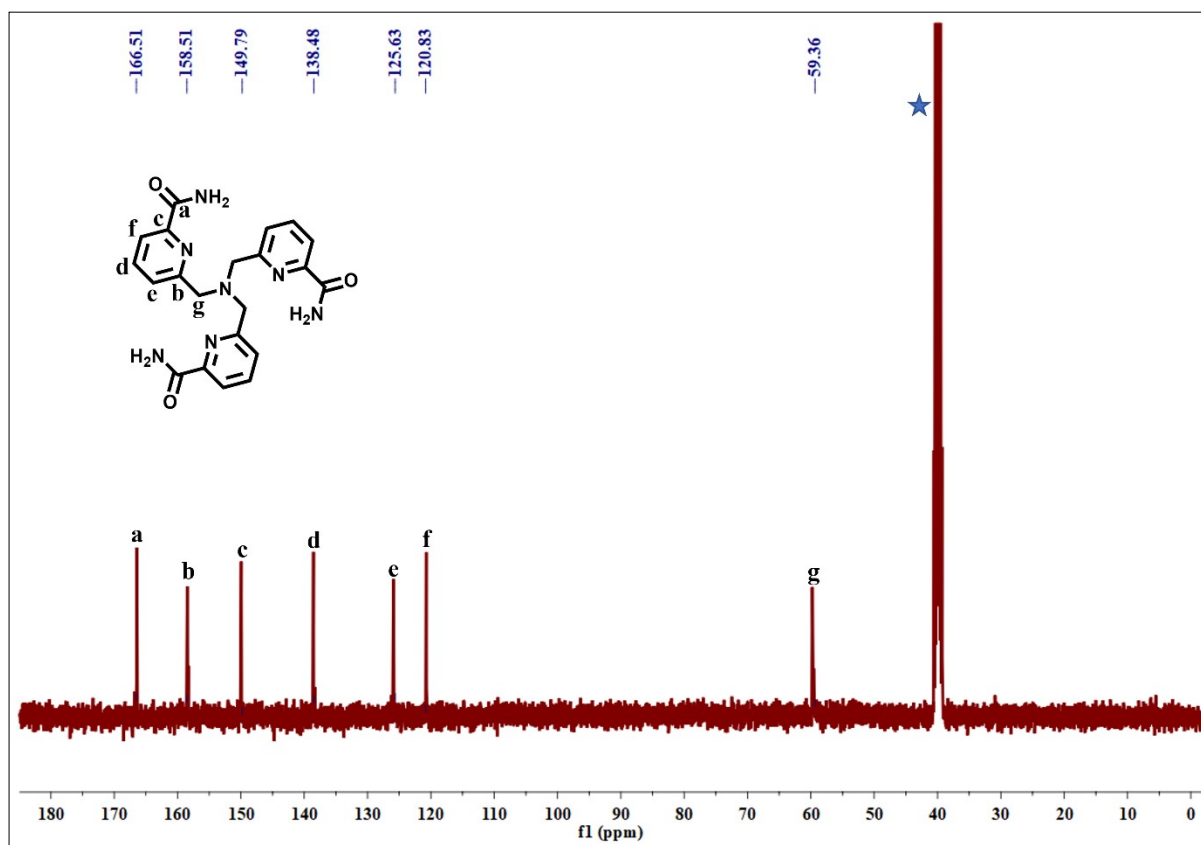



**Figure S8.**  $^{13}\text{C}$  NMR (100 MHz) of TMTTP recorded in  $\text{DMSO-}d_6$  (\* mark indicates the residual peak of solvent).

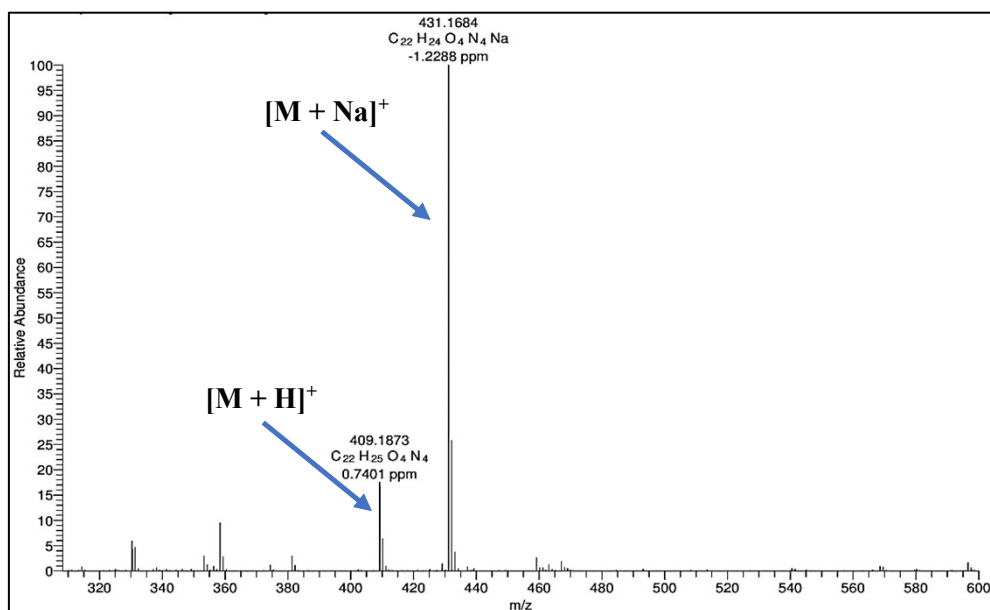

**Figure S9.** HRMS spectrum of compound 3.

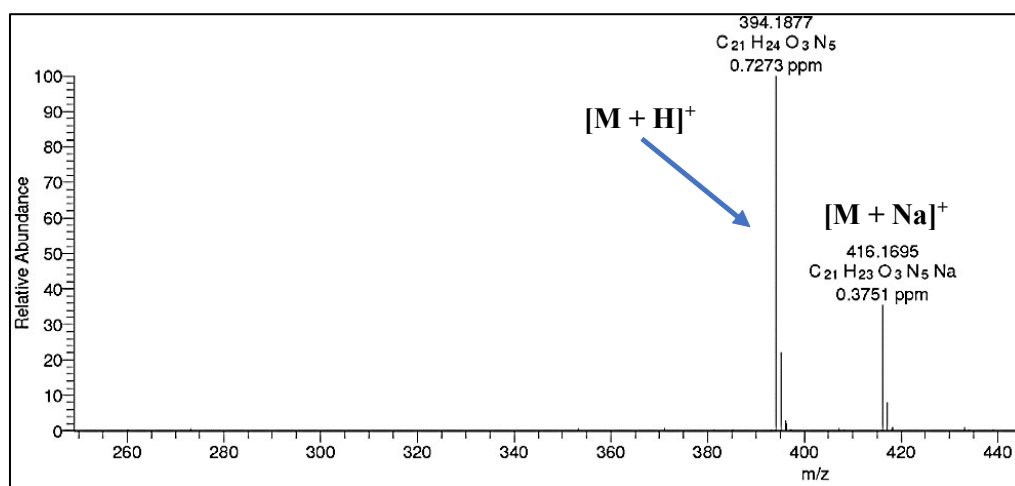

**Figure S10.** HRMS spectrum of ligand TDTA.

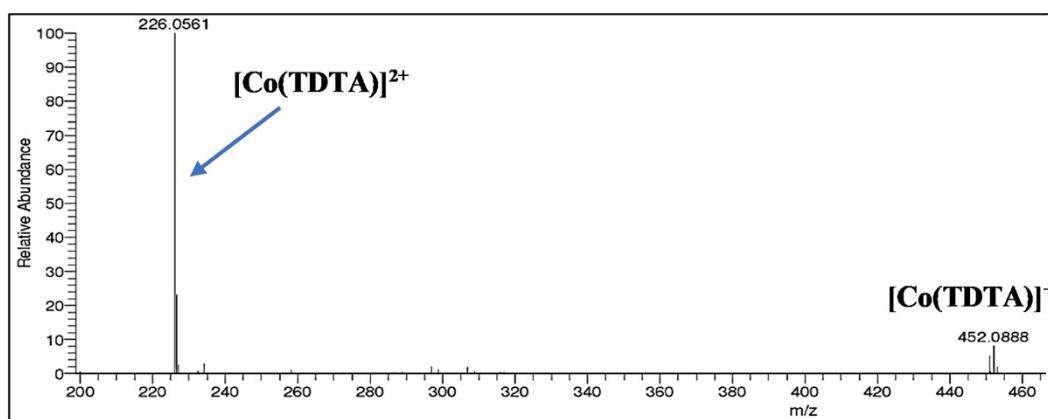

**Figure S11.** HRMS spectrum of  $[\text{Co}(\text{TDTA})]^{2+}$ .

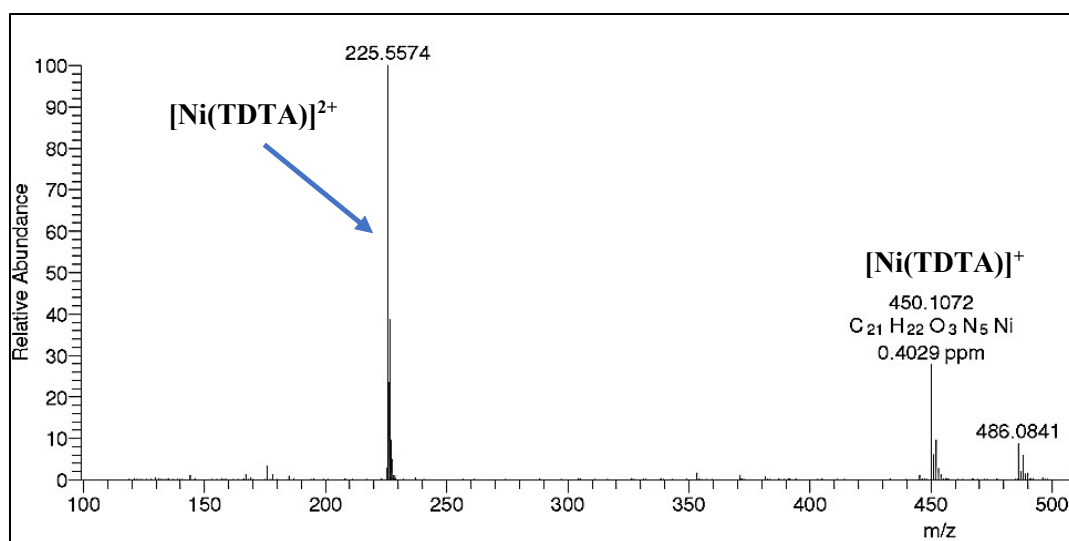

**Figure S12.** HRMS spectrum of  $[\text{Ni}(\text{TDTA})]^{2+}$ .

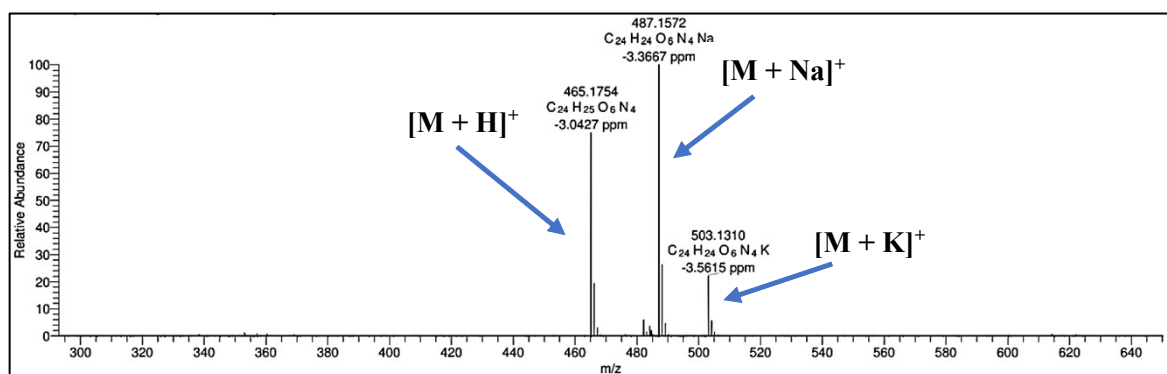

**Figure S13.** HRMS spectrum of compound 4.

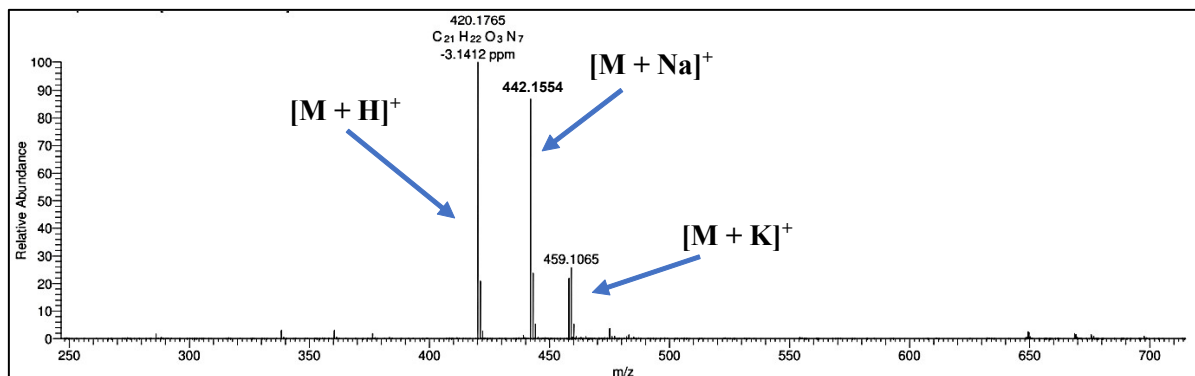

**Figure S14.** HRMS spectrum of ligand TMTP.

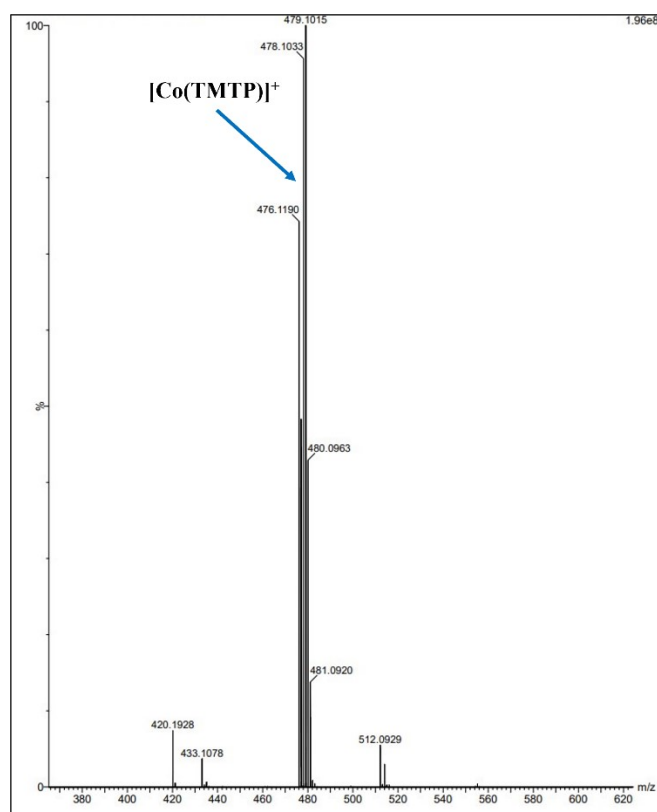

**Figure S15.** HRMS spectrum of [Co(TMTP)]<sup>+</sup>.

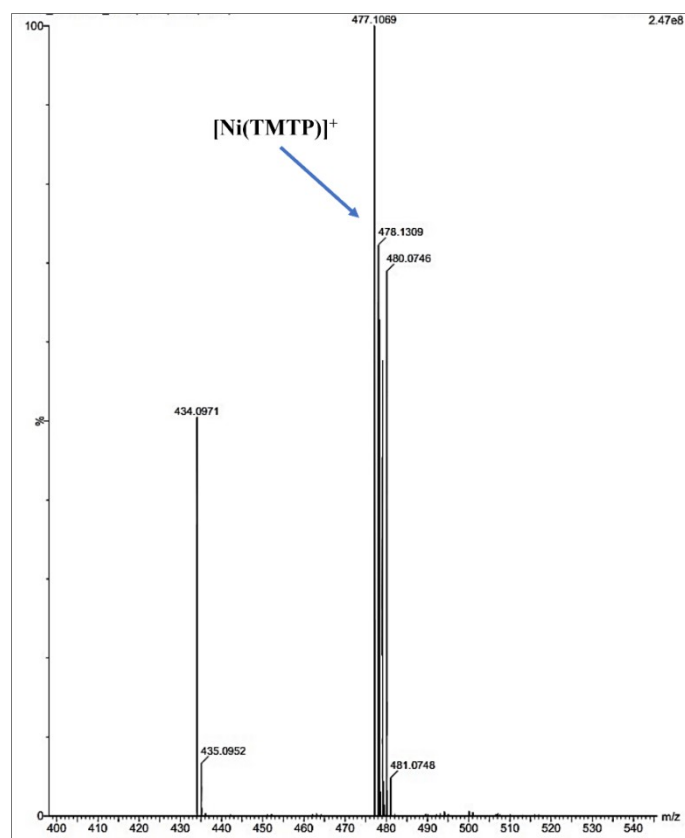

**Figure S16.** HRMS spectrum of  $[\text{Ni}(\text{TMTP})]^+$ .

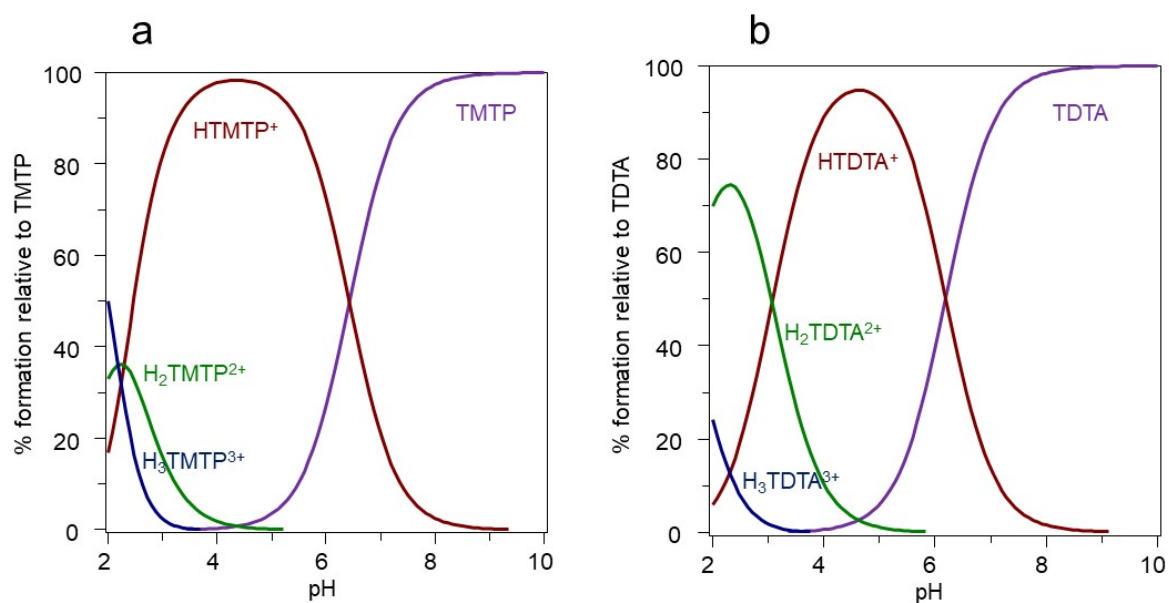

**Figure S17.** Species distribution diagram for TMTP and TDTA at 25.0 °C and  $I = 0.15 \text{ mol}\cdot\text{L}^{-1}$   $\text{NaClO}_4$ .

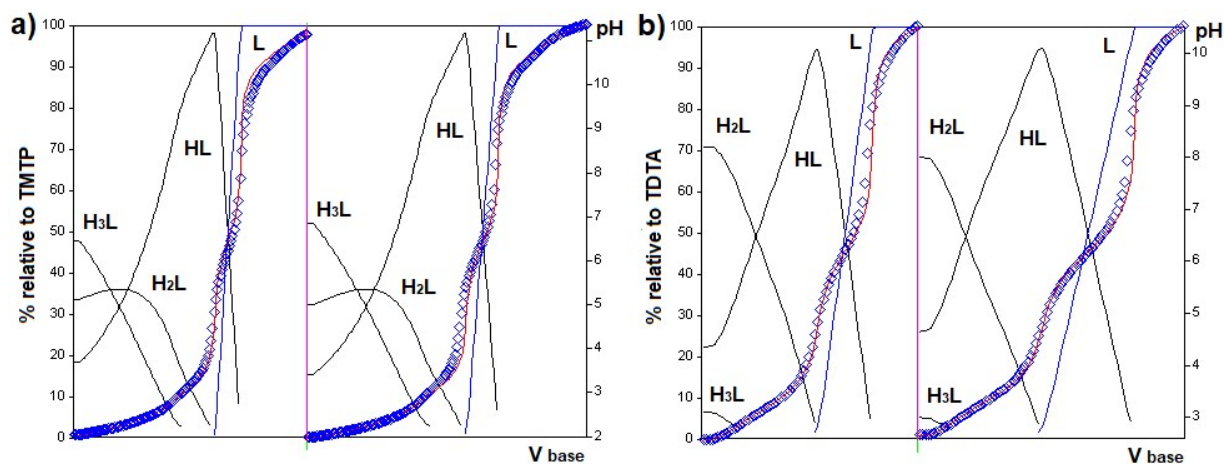

**Figure S18.** Fit goodness for the protonation of TMTP (a) and TDTA (b), (0.15 M NaClO<sub>4</sub> at 25.0 °C).

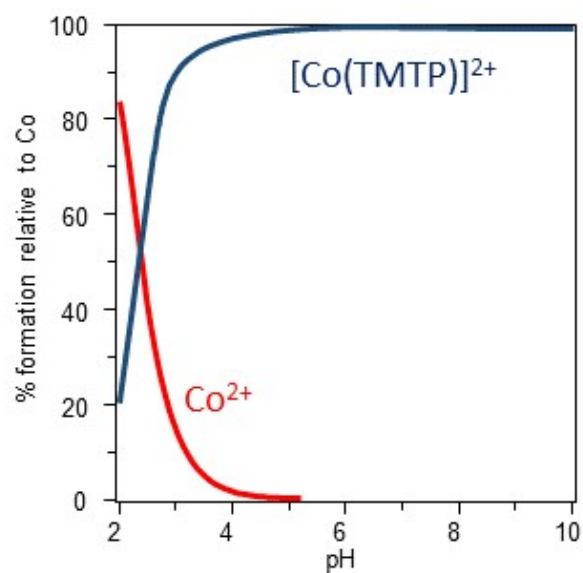

**Figure S19.** Species distribution diagram for Co-TMTP system at 25.0 °C and  $I = 0.15 \text{ mol}\cdot\text{L}^{-1}$  NaClO<sub>4</sub>.  $[\text{Co}^{2+}]_{\text{total}} = 0.002 \text{ mol}\cdot\text{L}^{-1}$ ,  $[\text{TMTP}]_{\text{total}} = 0.004 \text{ mol}\cdot\text{L}^{-1}$ .

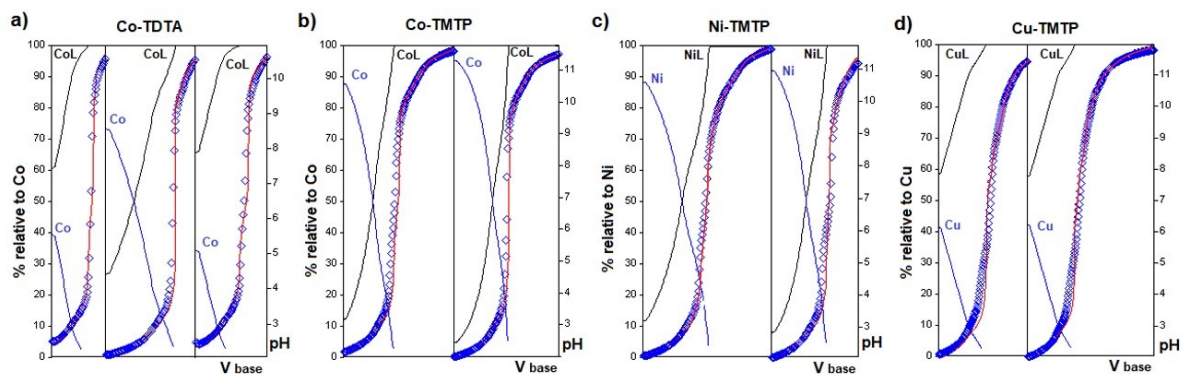

**Figure S20.** Fit goodness for the systems Co(II)-TDTA (a), Co(II)-TMTP (b), Ni(II)-TMTP (c), and Cu(II)-TMTP (d) (0.15 M NaClO<sub>4</sub> at 25.0 °C).

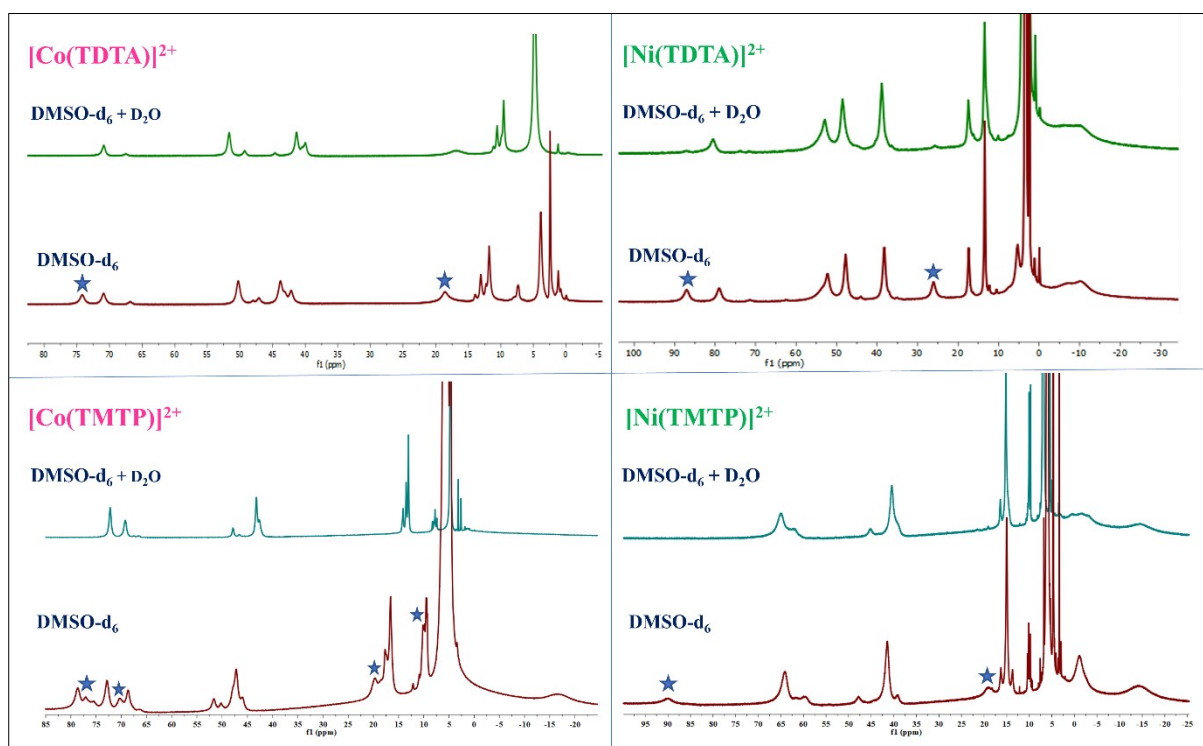

**Figure S21.** <sup>1</sup>H NMR spectra of the four complexes recorded in DMSO-*d*<sub>6</sub> and upon addition of 30 μL D<sub>2</sub>O to the same NMR tube. The exchangeable protons are represented by an \* mark.

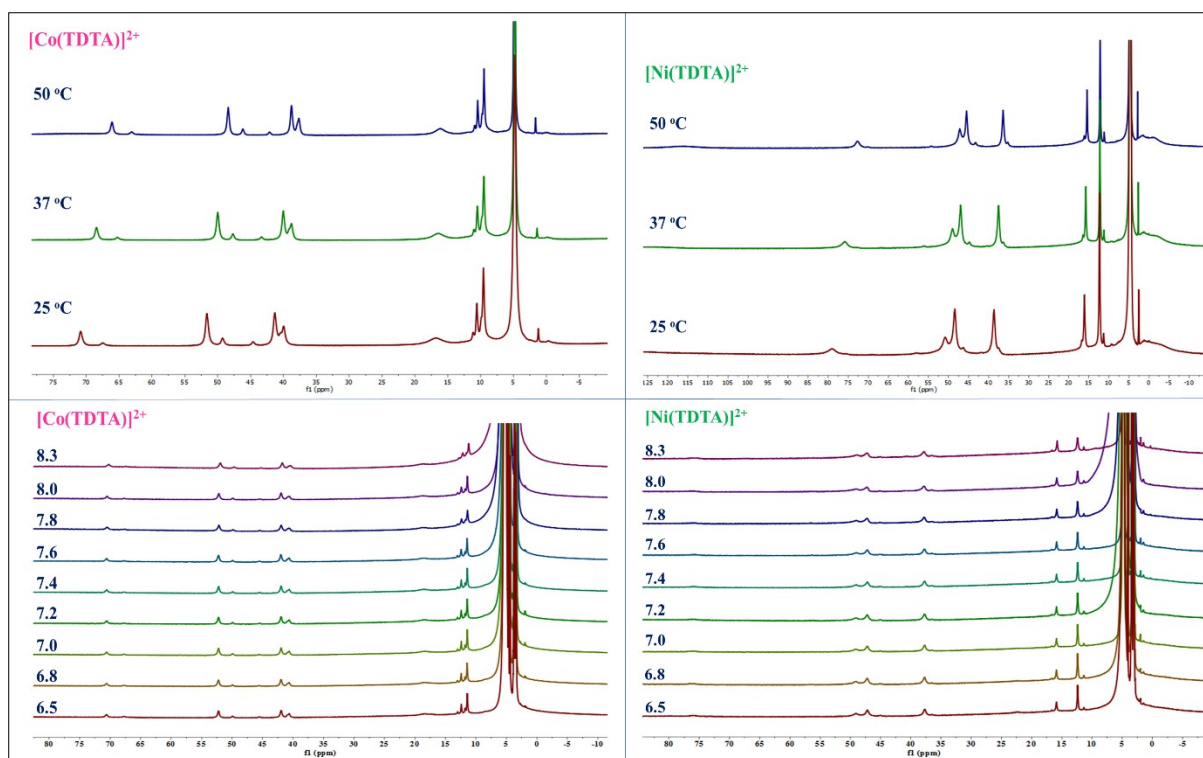

**Figure S22.**  $^1\text{H}$  NMR spectra of the  $[\text{Co}(\text{TDTA})]^{2+}$  and  $[\text{Ni}(\text{TDTA})]^{2+}$  by varying temperature (top) and pH (bottom). Temperature variation experiments were recorded in  $\text{D}_2\text{O}$ . pH variation experiments were performed by taking 10 mM complex, 20 mM HEPES, and 100 mM NaCl at 37 °C in distilled water, a  $\text{D}_2\text{O}$ -sealed capillary tube was used inside the NMR tube for locking purposes.

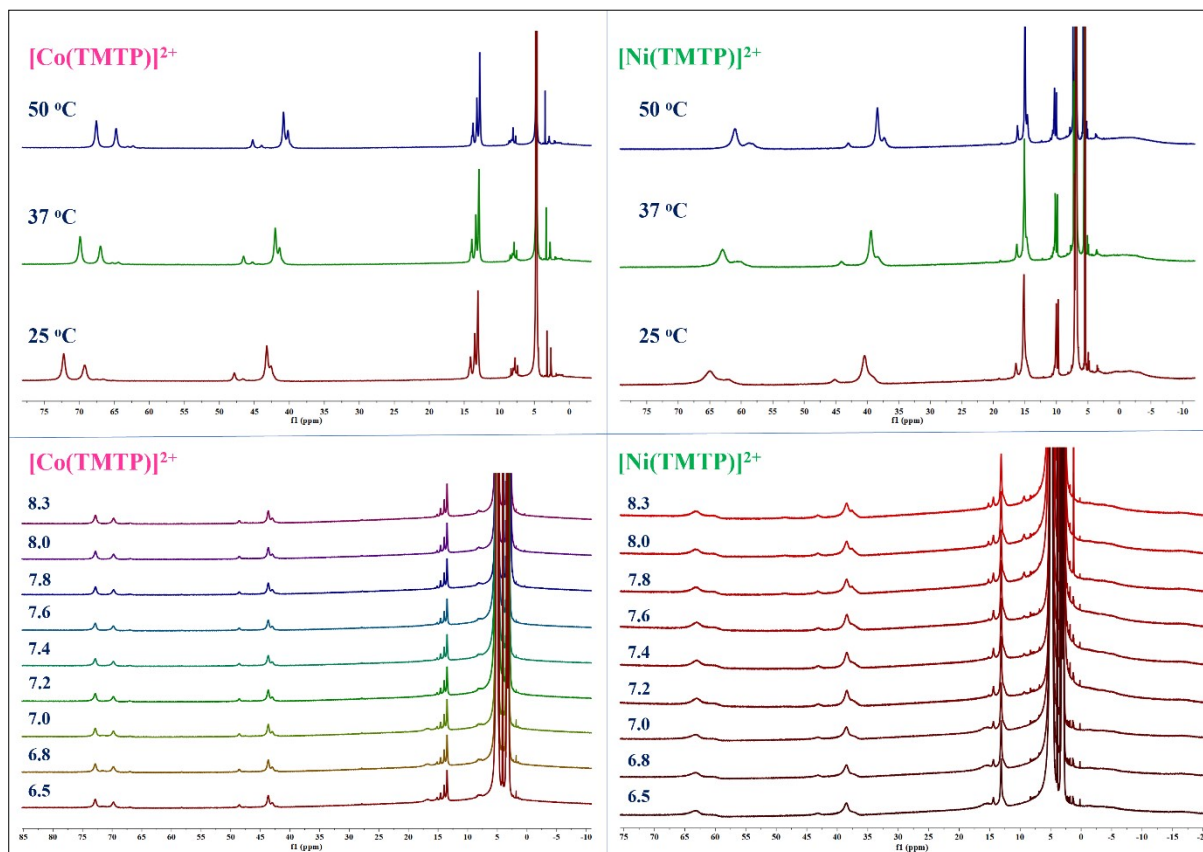

**Figure S23.**  $^1\text{H}$  NMR spectra of the  $[\text{Co}(\text{TMTP})]^{2+}$  and  $[\text{Ni}(\text{TMTP})]^{2+}$  by varying temperature (top) and pH (bottom). Temperature variation experiments were recorded in  $\text{D}_2\text{O}$ . pH variation experiments were performed by taking 10 mM complex, 20 mM HEPES, and 100 mM NaCl at 37 °C in distilled water, a  $\text{D}_2\text{O}$ -sealed capillary tube was used inside the NMR tube for locking purposes.

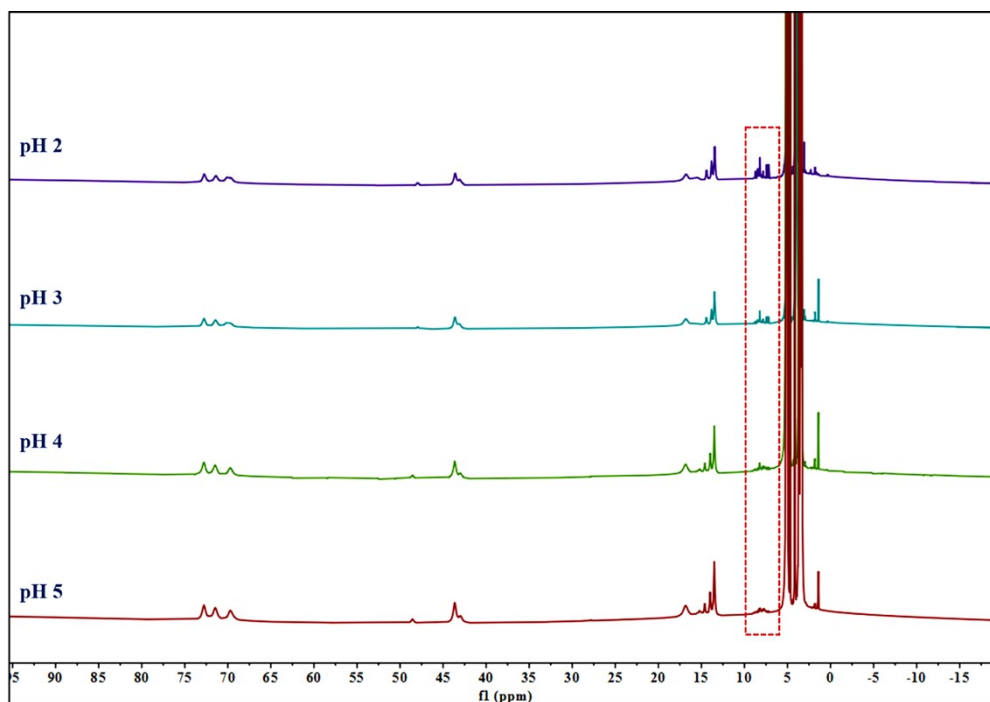

**Figure S24.**  $^1\text{H}$  NMR spectra (400 MHz) of 10 mM of  $[\text{Co}(\text{TMTP})]^{2+}$  in aqueous solutions containing 20 mM HEPES and 100 mM NaCl, buffered at various pH values from 2 – 5. The highlighted dotted region depicts the complex dissociation at lower pH values.



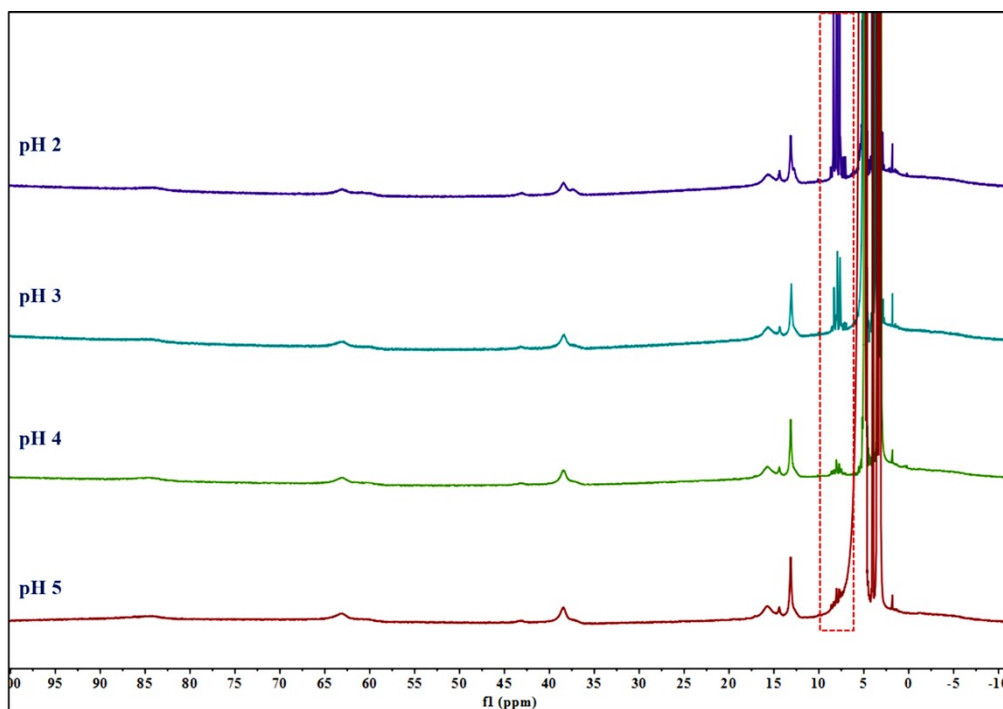

**Figure S25.** <sup>1</sup>H NMR spectra (400 MHz) of 10 mM of [Ni(TMTP)]<sup>2+</sup> in aqueous solutions containing 20 mM HEPES and 100 mM NaCl, buffered at various pH values from 2 – 5. The highlighted dotted region depicts the complex dissociation at lower pH values.

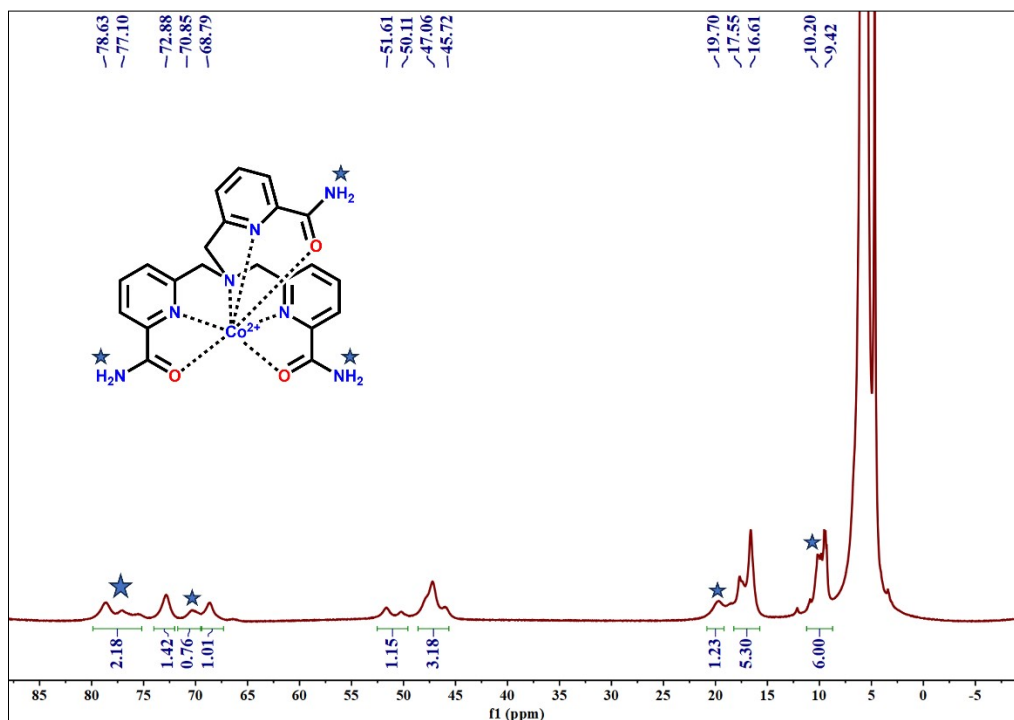

**Figure S26.** 400 MHz NMR spectrum of the TMTP-Co complex in DMSO-*d*<sub>6</sub> with the integration of all individual peaks (\* mark indicates the presence of exchangeable protons).

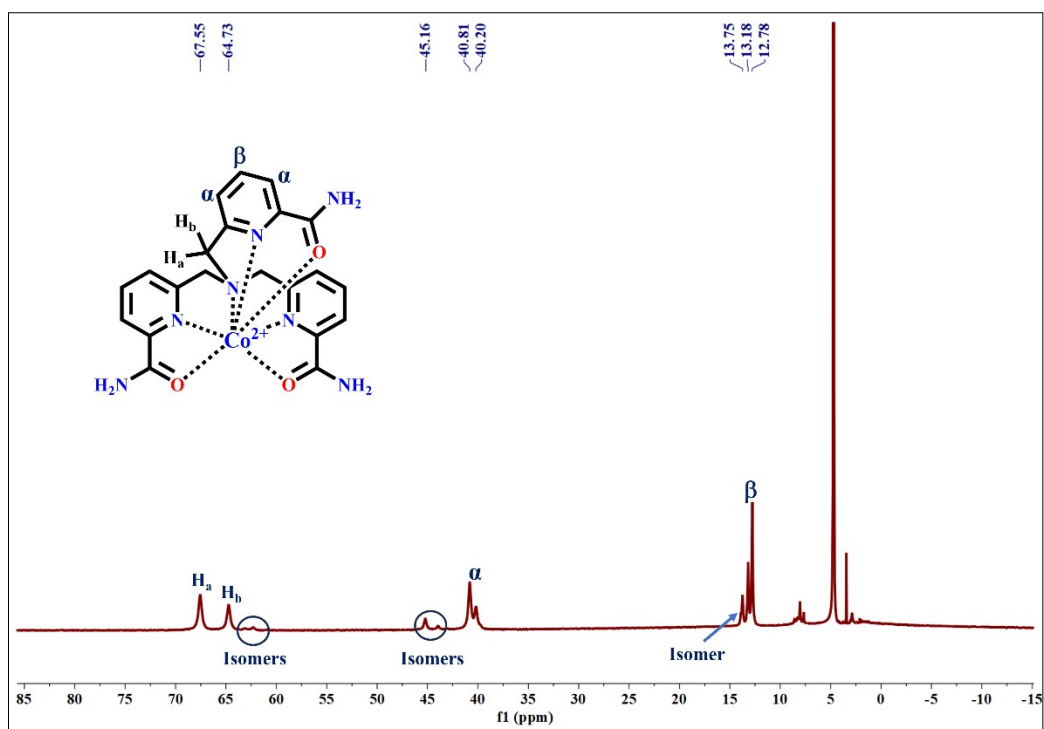

**Figure S27.** 400 MHz NMR spectrum of the TMTP-Co complex in D<sub>2</sub>O with the identification of all paramagnetic protons and their corresponding isomers.

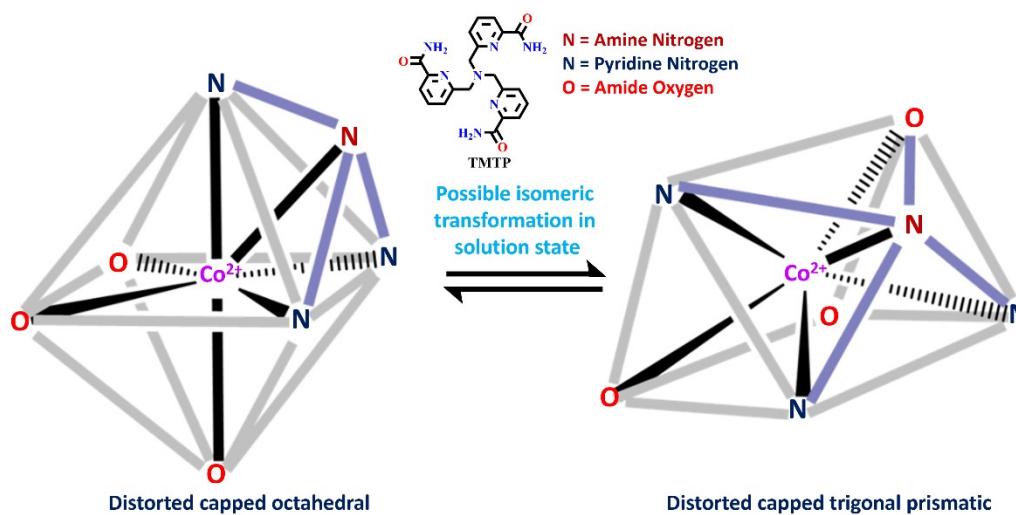

**Figure S28.** Possible isomers of the TMTP-Co complex in its solution state.

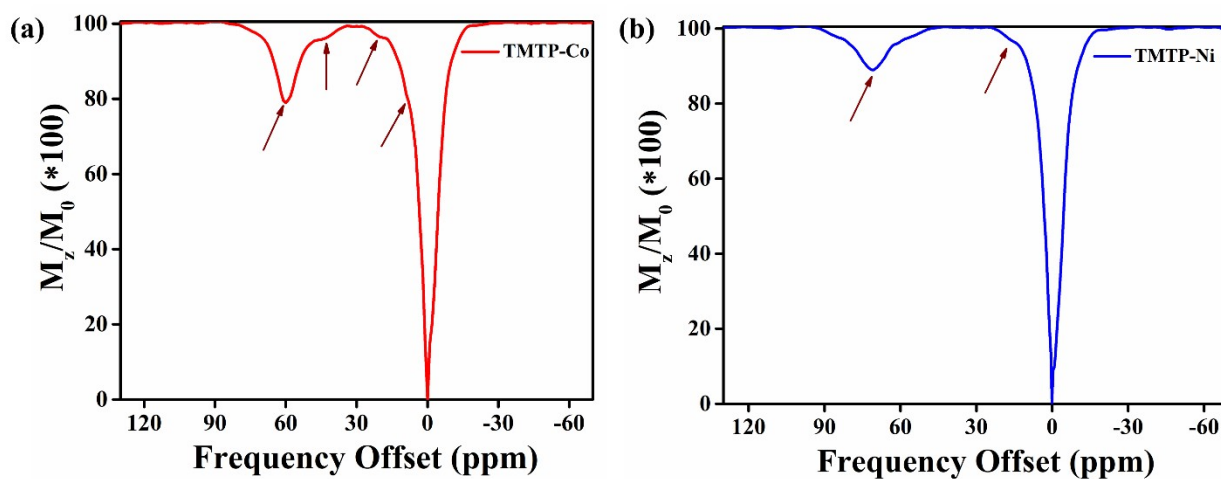

**Figure S29.** CEST peak positions of the amide protons in TMTP-Co and TMTP-Ni complexes.

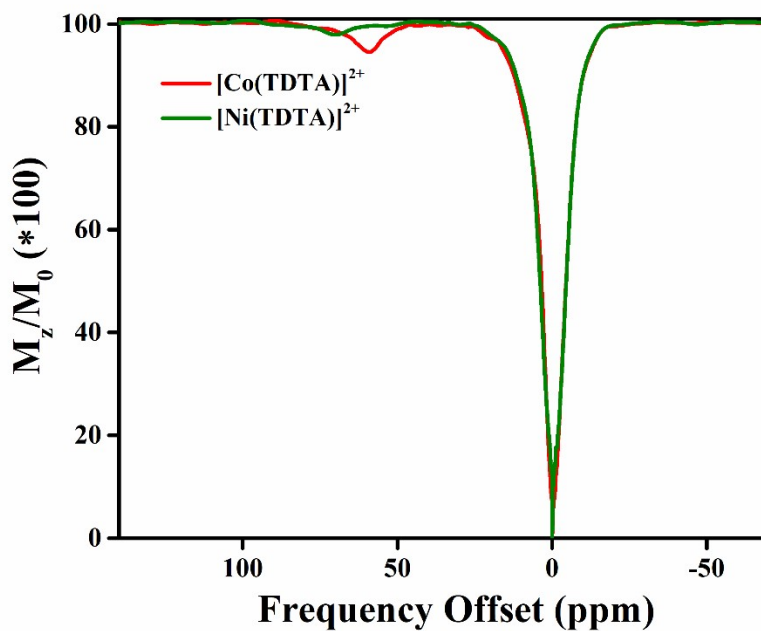

**Figure S30.** CEST spectra of 10 mM  $[\text{Co}(\text{TDTA})]^{2+}$  and  $[\text{Ni}(\text{TDTA})]^{2+}$  (20 mM HEPES, pH 7.4, 400 MHz) at 37 °C with a saturation time of 4 s and saturation power of  $B_1 = 25 \mu\text{T}$

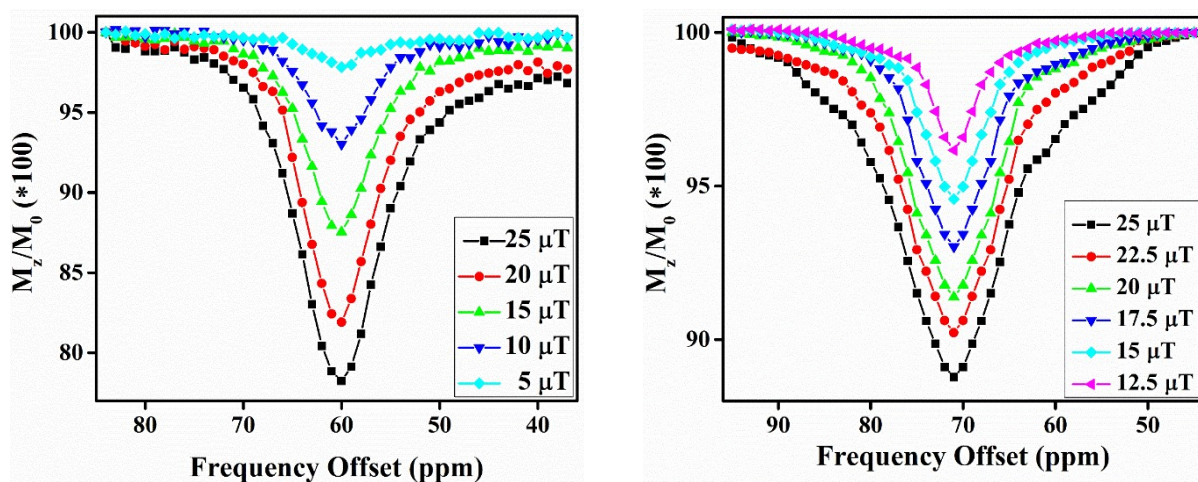

**Figure S31.** CEST spectra of the exchangeable proton region of 10 mM  $[\text{Co}(\text{TMTP})]^{2+}$  (left) and  $[\text{Ni}(\text{TMTP})]^{2+}$  (right) in 20 mM HEPES and 100 mM NaCl at pH 7.4 with varied pre-saturation power levels. RF pre-saturation pulse was applied for 4 s with varying saturation power of 5  $\mu\text{T}$  to 25  $\mu\text{T}$  for  $[\text{Co}(\text{TMTP})]^{2+}$  and 15 to 25  $\mu\text{T}$  for  $[\text{Ni}(\text{TMTP})]^{2+}$ .

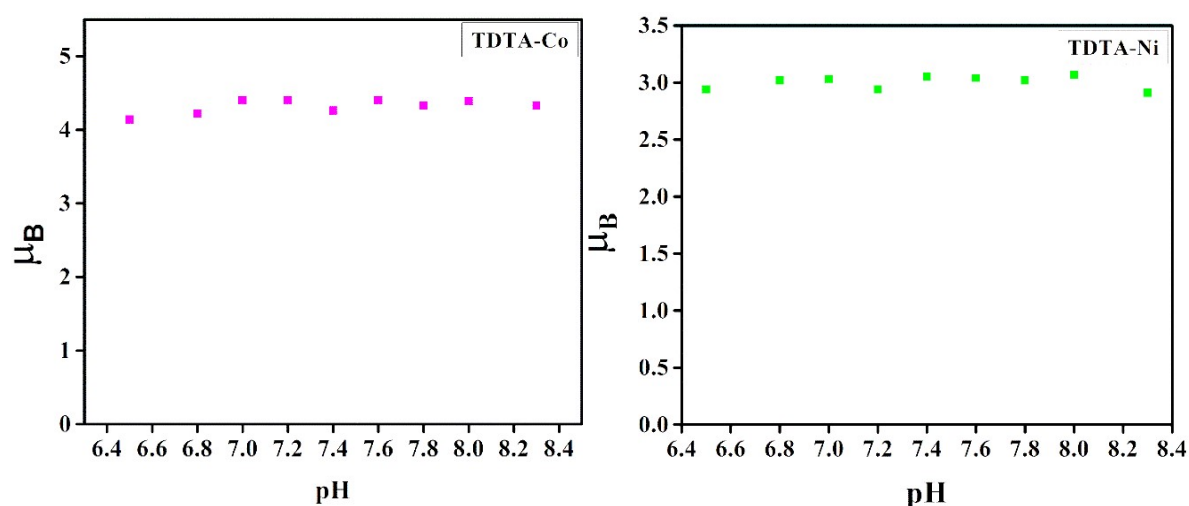

**Figure S32.** Solution magnetic susceptibility data for  $[\text{Co}(\text{TDTA})]^{2+}$  (left) and  $[\text{Ni}(\text{TDTA})]^{2+}$  (right) were recorded at different pH by using 3 – 5 mM complex, 20 mM HEPES, and 100 mM NaCl at 37 °C.

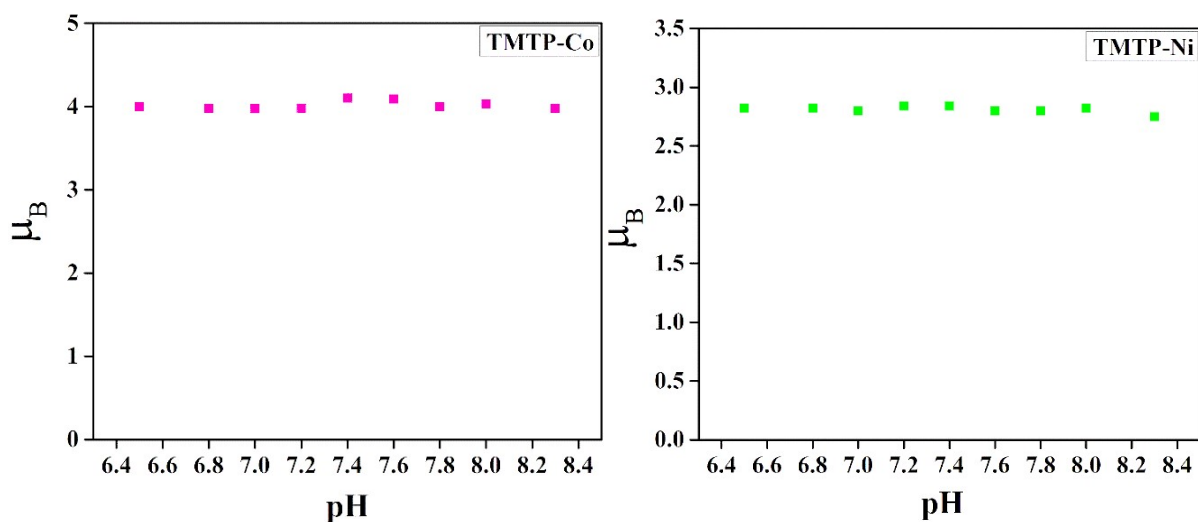

**Figure S33.** Solution magnetic susceptibility data for  $[\text{Co}(\text{TMTP})]^{2+}$  (left) and  $[\text{Ni}(\text{TMTP})]^{2+}$  (right) were recorded at different pH by using 3 – 5 mM complex, 20 mM HEPES, and 100 mM NaCl at 37 °C.

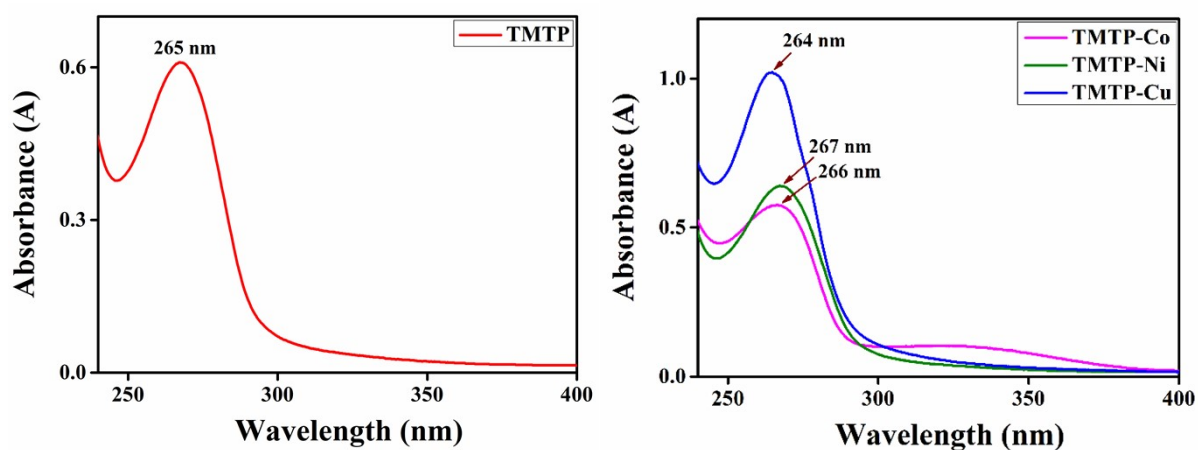

**Figure S34.** UV spectrum (50  $\mu\text{M}$ ) of the ligand TMTP (left) and its Co(II), Ni(II), and Cu(II) complexes (right), recorded in 20 mM HEPES, and 100 mM NaCl at pH 7.4.

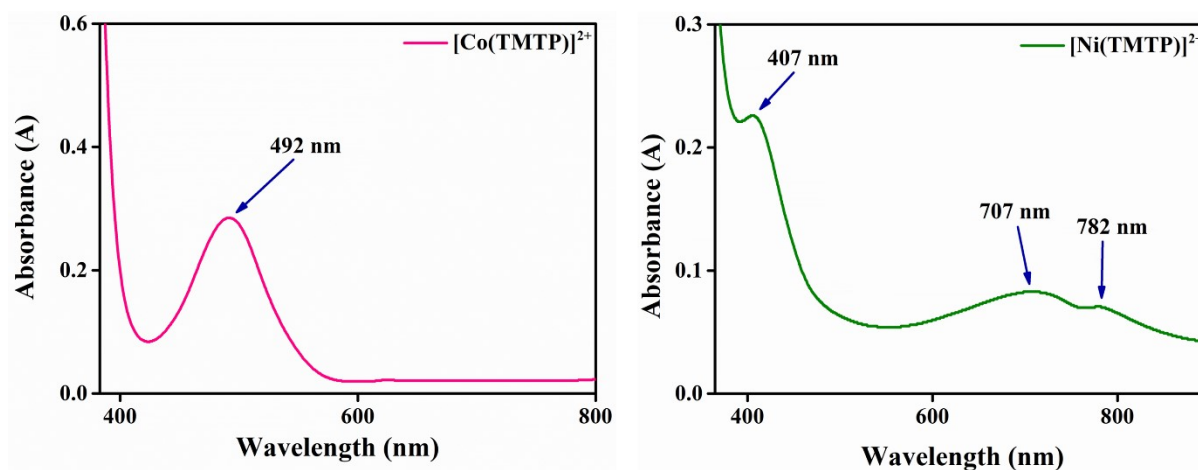

**Figure S35.** UV-Vis spectra of  $[\text{Co}(\text{TMTP})]^{2+}$  (left) and  $[\text{Ni}(\text{TMTP})]^{2+}$  (right) (5 mM) in 20 mM HEPES, and 100 mM NaCl at pH 7.4.

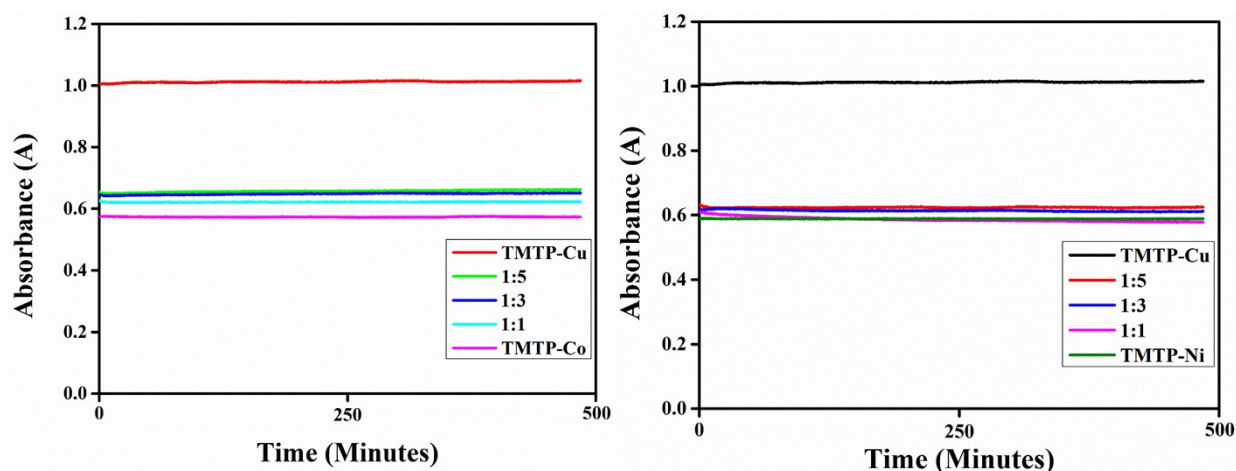

**Figure S36.** Metal displacement reaction of the  $[\text{Co}(\text{TMTP})]^{2+}$  and  $[\text{Ni}(\text{TMTP})]^{2+}$  complexes with competing  $\text{Cu}(\text{II})$  ion, monitored for 8 hours at 264 nm. Samples containing 50  $\mu\text{M}$   $[\text{Co}(\text{TMTP})]^{2+}$  or  $[\text{Ni}(\text{TMTP})]^{2+}$  with 1, 2, and 5 equivalent ratios of  $\text{CuCl}_2$  ions in aqueous solutions containing 20 mM HEPES and 100 mM NaCl buffered at pH 7.4. A 50  $\mu\text{M}$   $[\text{Cu}(\text{TMTP})]^{2+}$  sample is present to determine the absorbance of a 100% dissociation.

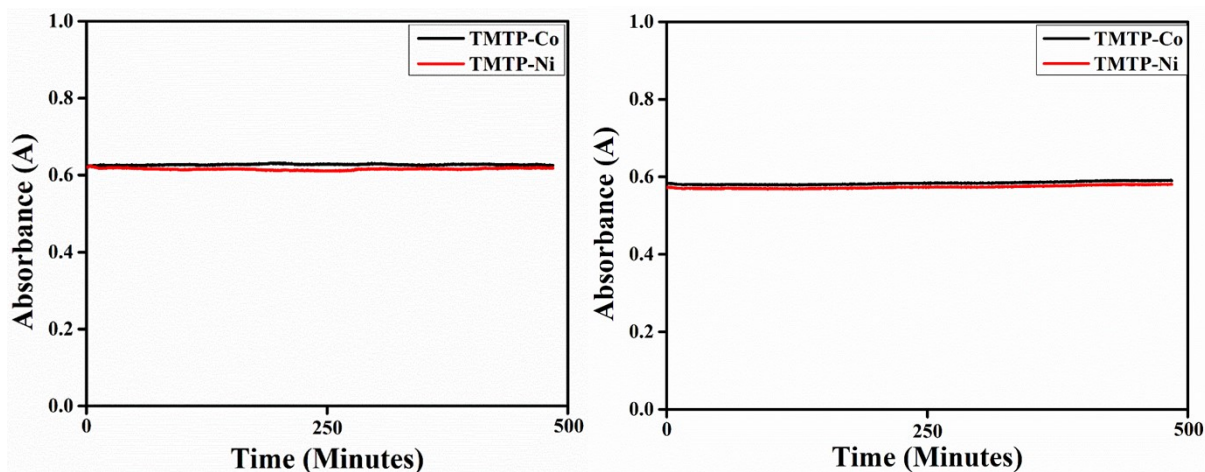

**Figure S37.** UV-Vis kinetic study of the complexes  $[\text{Co}(\text{TMTP})]^{2+}$  and  $[\text{Ni}(\text{TMTP})]^{2+}$  at 264 nm in acidic conditions, pH 4, (left) and in the presence of competing anions like 25 mM  $\text{K}_2\text{CO}_3$  and 0.4 mM  $\text{K}_2\text{HPO}_4$  (right).

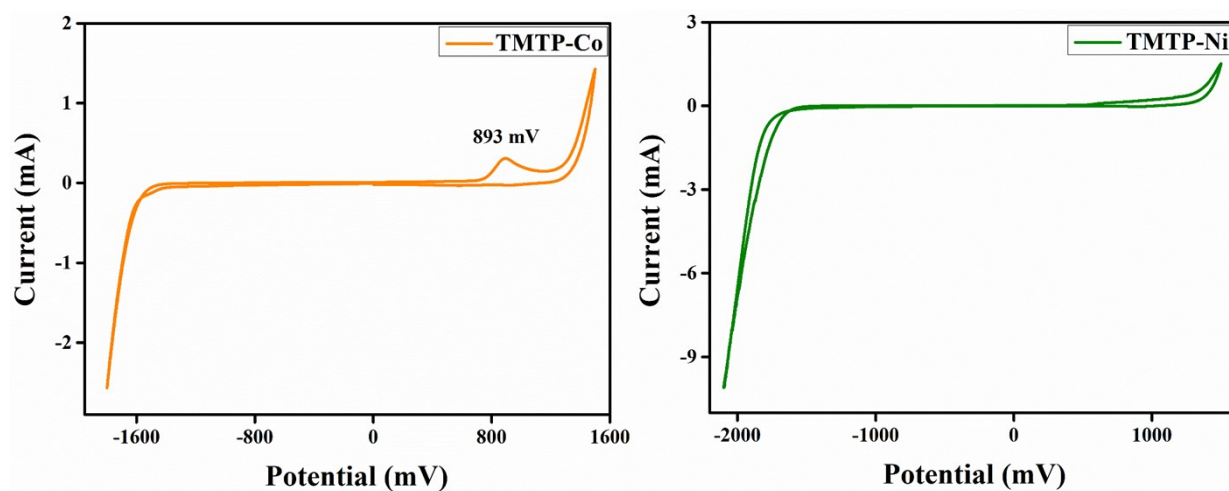

**Figure S38.** Cyclic voltammogram of  $[\text{Co}(\text{TMTP})]^{2+}$  (left) and  $[\text{Ni}(\text{TMTP})]^{2+}$  (right) recorded in an aqueous phase contained 1 mM complex, 20 mM HEPES, and 100 mM NaCl (pH = 7.4).

**Table S1.** Selected bond angles of the four complexes.

| $[\text{Co}(\text{TDTA})] \cdot 2\text{Cl} \cdot \text{H}_2\text{O}$ | $[\text{Ni}(\text{TDTA})\text{Cl}] \cdot \text{Cl} \cdot 2\text{H}_2\text{O}$ | $[\text{Co}(\text{TMTP})] \cdot 2\text{Cl}$ | $[\text{Ni}(\text{TMTP})] \cdot 2\text{Cl}$ |
|----------------------------------------------------------------------|-------------------------------------------------------------------------------|---------------------------------------------|---------------------------------------------|
| <b>Bond angles (deg)</b>                                             |                                                                               |                                             |                                             |
| N(1)-Co(1)-N(3)                                                      | N(4)-Ni(1)-N(2)                                                               | N(4)-Co(1)-N(2)                             | O(3)-Ni(1)-O(1)                             |
| N(1)-Co(1)-N(4)                                                      | N(4)-Ni(1)-O(3)                                                               | N(4)-Co(1)-N(6)                             | O(3)-Ni(1)-O(2)                             |
| N(3)-Co(1)-N(4)                                                      | N(2)-Ni(1)-O(3)                                                               | N(2)-Co(1)-N(6)                             | O(1)-Ni(1)-O(2)                             |
| N(1)-Co(1)-O(2)                                                      | N(4)-Ni(1)-N(1)                                                               | N(4)-Co(1)-O(1)                             | O(3)-Ni(1)-N(3)                             |
| N(3)-Co(1)-O(2)                                                      | N(2)-Ni(1)-N(1)                                                               | N(2)-Co(1)-O(1)                             | O(1)-Ni(1)-N(3)                             |
| N(4)-Co(1)-O(2)                                                      | O(3)-Ni(1)-N(1)                                                               | N(6)-Co(1)-O(1)                             | O(2)-Ni(1)-N(3)                             |
| N(1)-Co(1)-O(1)                                                      | N(4)-Ni(1)-N(3)                                                               | N(4)-Co(1)-O(3)                             | O(3)-Ni(1)-N(1)                             |
| N(3)-Co(1)-O(1)                                                      | N(2)-Ni(1)-N(3)                                                               | N(2)-Co(1)-O(3)                             | O(1)-Ni(1)-N(1)                             |
| N(4)-Co(1)-O(1)                                                      | O(3)-Ni(1)-N(3)                                                               | N(6)-Co(1)-O(3)                             | O(2)-Ni(1)-N(1)                             |
| O(2)-Co(1)-O(1)                                                      | N(1)-Ni(1)-N(3)                                                               | O(1)-Co(1)-O(3)                             | N(3)-Ni(1)-N(1)                             |
| N(1)-Co(1)-O(3)                                                      | N(4)-Ni(1)-Cl(1)                                                              | N(4)-Co(1)-O(2)                             | O(3)-Ni(1)-N(4)                             |
| N(3)-Co(1)-O(3)                                                      | N(2)-Ni(1)-Cl(1)                                                              | N(2)-Co(1)-O(2)                             | O(1)-Ni(1)-N(4)                             |
| N(4)-Co(1)-O(3)                                                      | O(3)-Ni(1)-Cl(1)                                                              | N(6)-Co(1)-O(2)                             | O(2)-Ni(1)-N(4)                             |
| O(2)-Co(1)-O(3)                                                      | N(1)-Ni(1)-Cl(1)                                                              | O(1)-Co(1)-O(2)                             | N(3)-Ni(1)-N(4)                             |
| O(1)-Co(1)-O(3)                                                      | N(3)-Ni(1)-Cl(1)                                                              | O(3)-Co(1)-O(2)                             | N(1)-Ni(1)-N(4) 105.85(7)                   |
| N(1)-Co(1)-N(2)                                                      |                                                                               | N(4)-Co(1)-N(3)                             |                                             |
| N(3)-Co(1)-N(2)                                                      |                                                                               | N(2)-Co(1)-N(3)                             |                                             |
| N(4)-Co(1)-N(2)                                                      |                                                                               | N(6)-Co(1)-N(3)                             |                                             |
| O(2)-Co(1)-N(2)                                                      |                                                                               | O(1)-Co(1)-N(3)                             |                                             |
| O(1)-Co(1)-N(2)                                                      |                                                                               | O(3)-Co(1)-N(3)                             |                                             |
| O(3)-Co(1)-N(2)                                                      |                                                                               | O(2)-Co(1)-N(3)                             |                                             |
